# Supplementary material
Source: publisher figshare collection journal article supplement (https://acs.figshare.com/ndownloader/files/4328089)
Supplement: Supplementary file 1 [file 4328089]

# Supporting information for

## $\beta$ to $\alpha$ form transition observed in the crystalline structure of syndiotactic polystyrene (sPS)

*Tetsu Ouchi, Suguru Nagasaka and Atsushi Hotta\**

Department of Mechanical Engineering, Keio University, Yokohama 223-8522, Japan

AUTHOR EMAIL ADDRESS: [hotta@mech.keio.ac.jp](mailto:hotta@mech.keio.ac.jp)

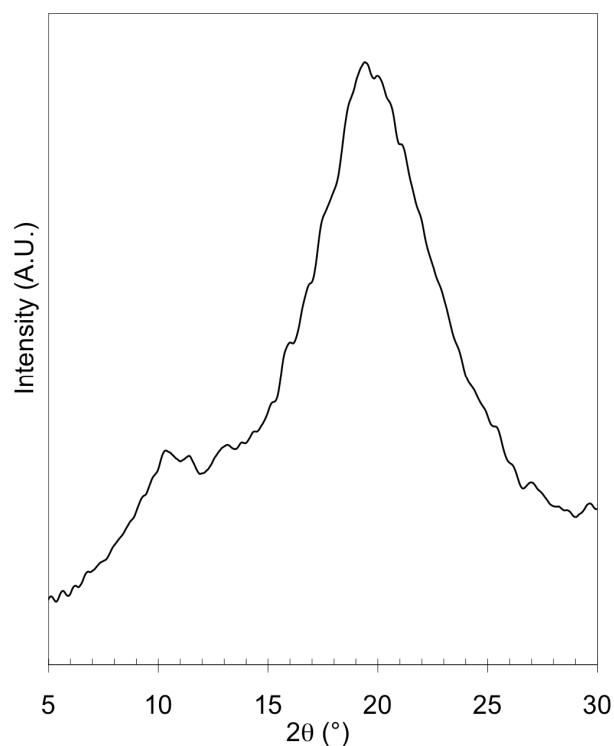

**Figure S1.** X-ray diffraction profile of amorphous specimen.

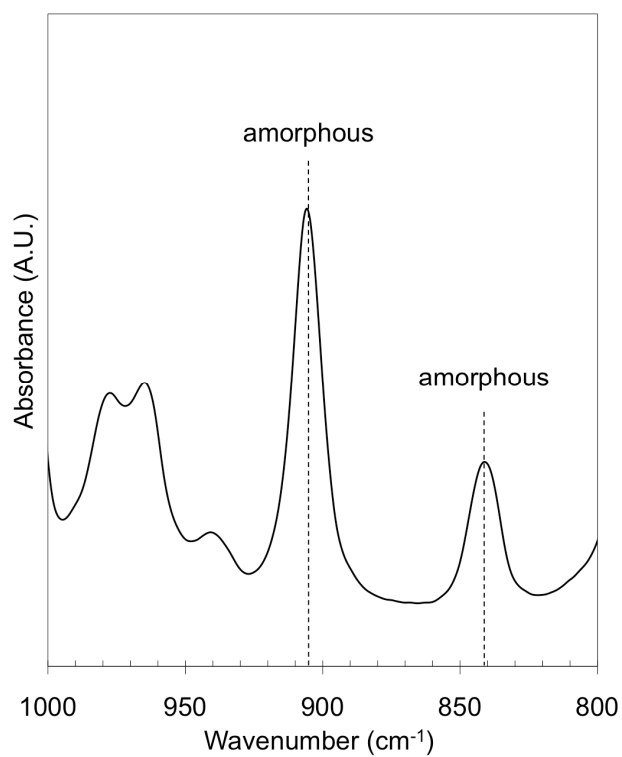

**Figure S2.** FTIR spectrum of amorphous specimen.

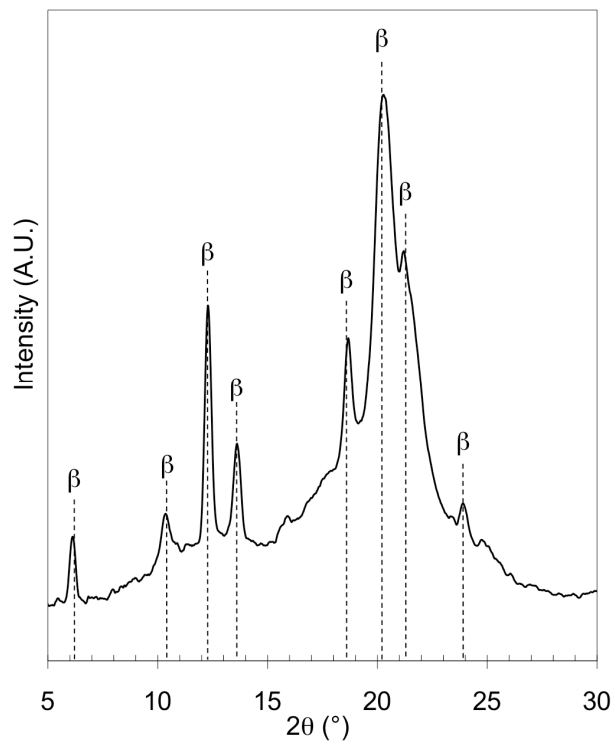

Figure S3. X-ray diffractogram of  $\beta$  specimen.

**Figure S3.** X-ray diffraction profile of  $\beta$  specimen.

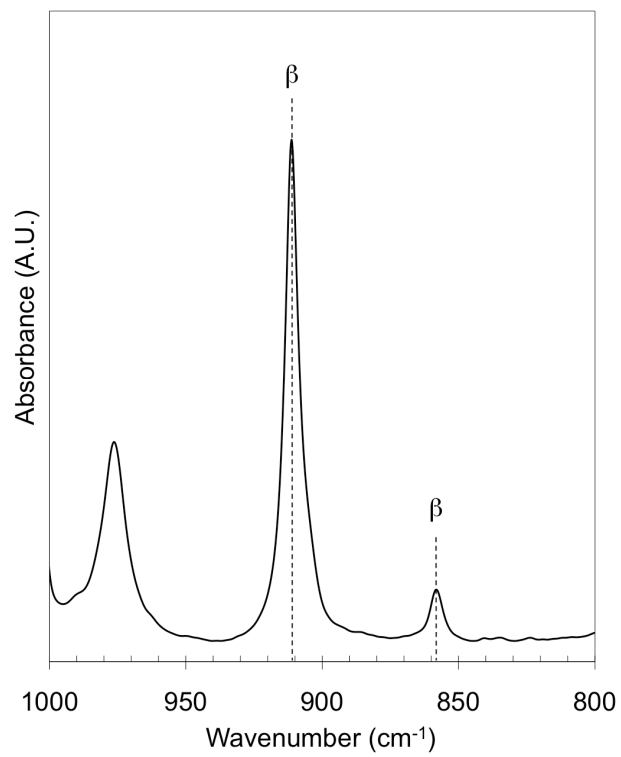

**Figure S4.** FTIR difference spectrum of  $\beta$  specimen.

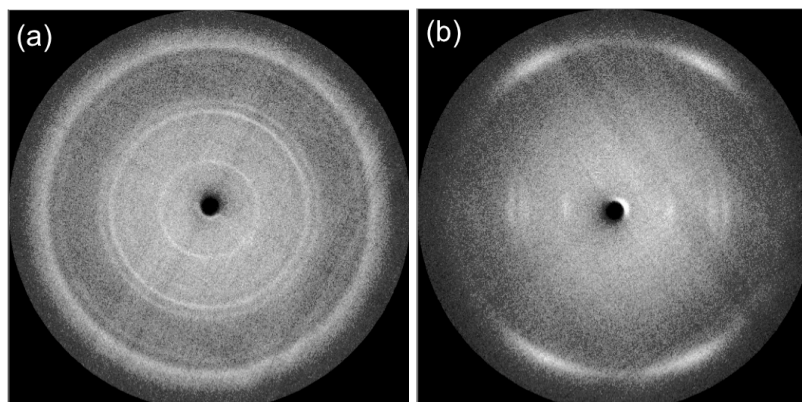

**Figure S5.** WAXS images: (a) 0% strain, and (b) 218°C 25% strain.

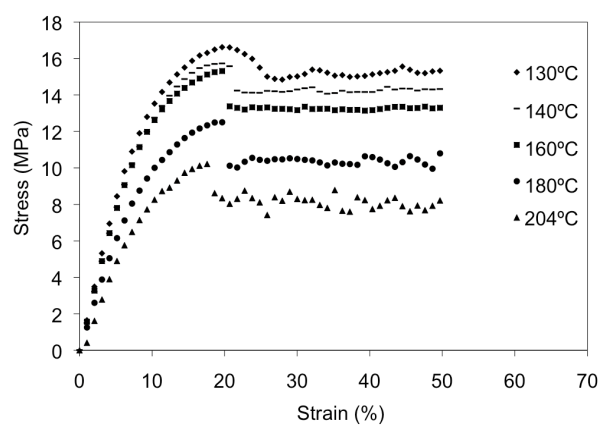

**Figure S6.** Stress-strain curves at different temperatures.

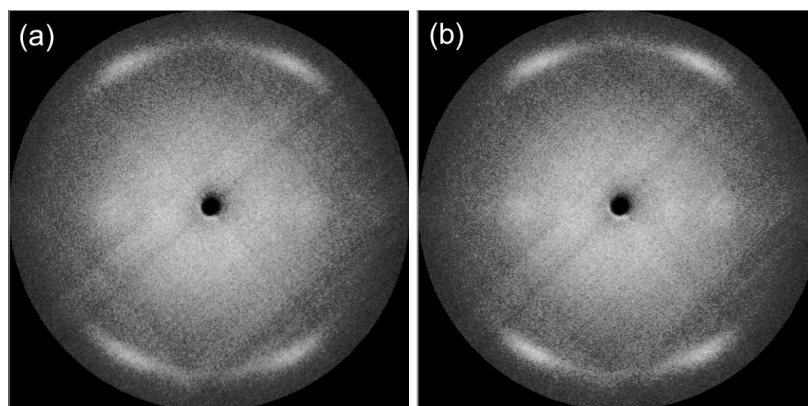

**Figure S7.** WAXS images of specimens after yielding at different temperatures of (a) 140°C and (b) 160°C.

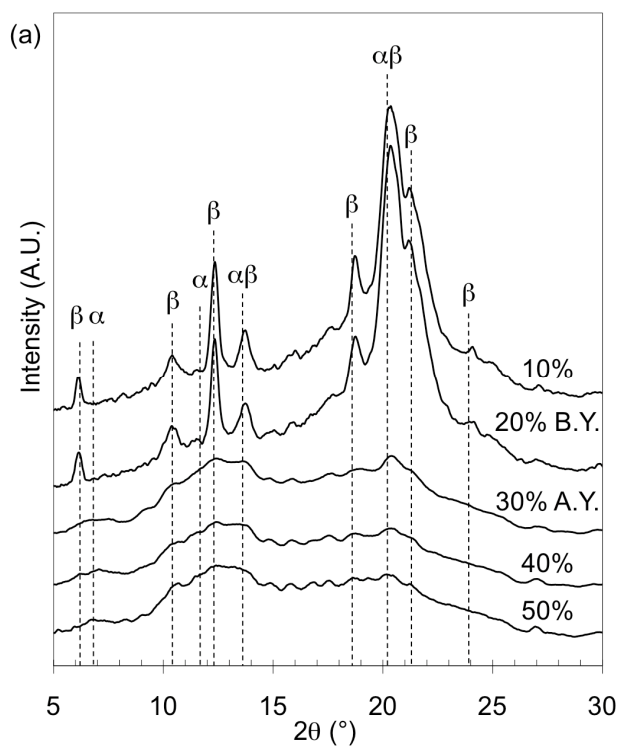

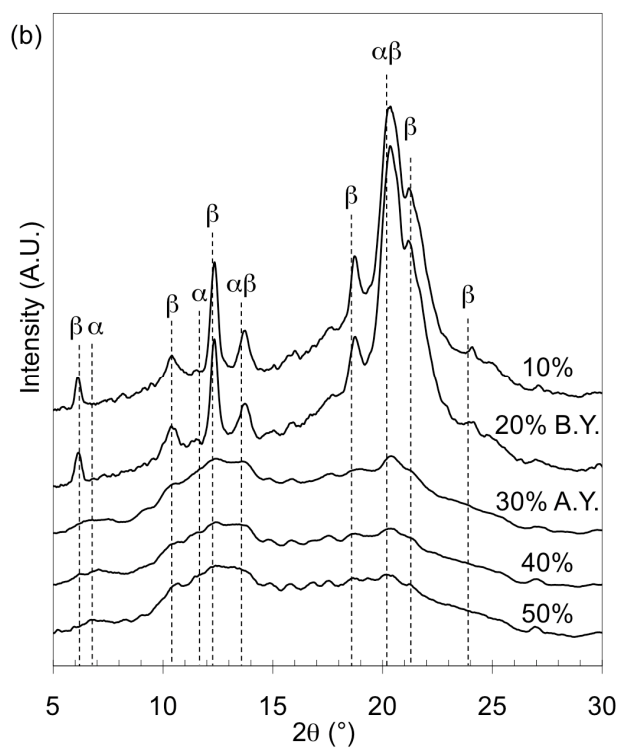

**Figure S8.** X-ray diffraction profiles by changing strains at different temperatures of (a) 140°C and (b) 160°C. B.Y. and A.Y. stand for “before yielding” and “after yielding” respectively.

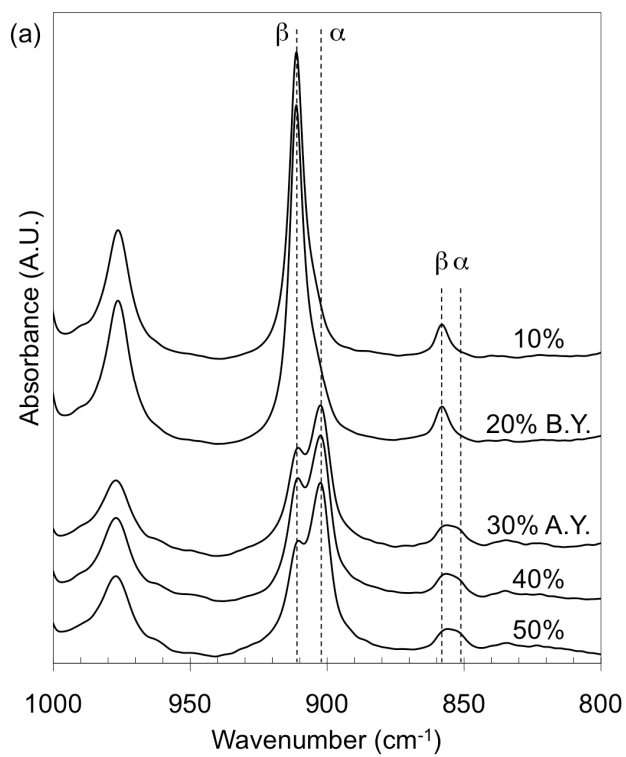

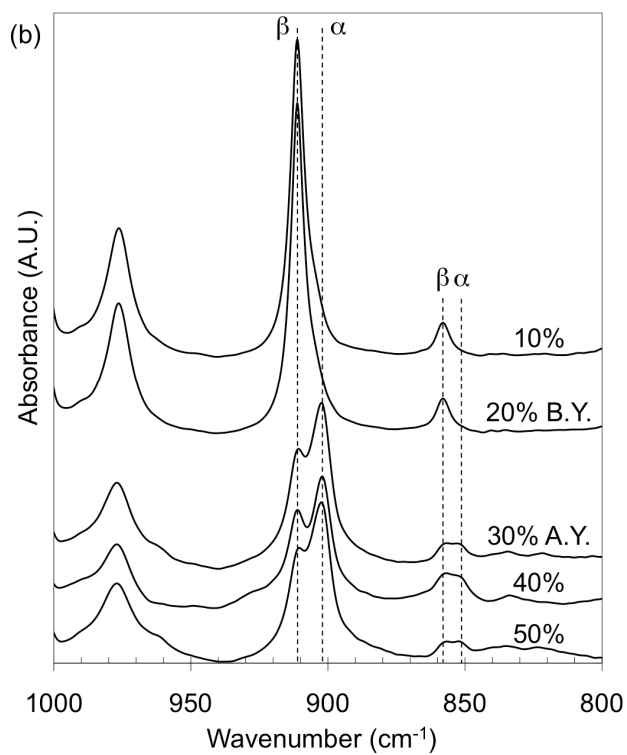

**Figure S9.** FTIR difference spectra as a function of strain at temperatures of (a) 140°C and (b) 160°C. B.Y. and A.Y. stand for “before yielding” and “after yielding” respectively.

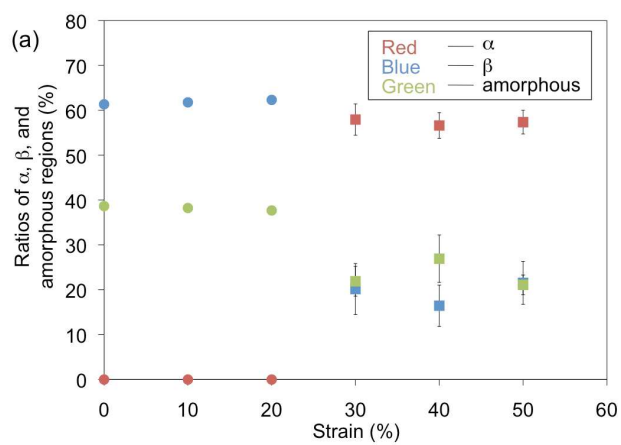

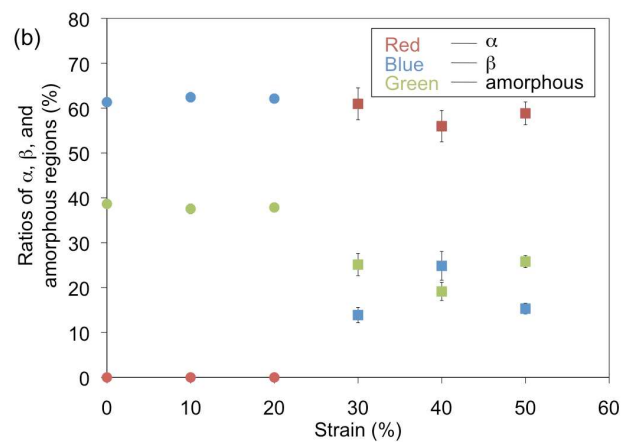

**Figure S10.** The ratios of  $\alpha$  (red),  $\beta$  (blue), and amorphous (green) regions as a function of strain at temperatures of (a) 140°C and (b) 160°C, before yielding (circles) and after yielding (squares).
